# Supplementary material for: Social fluidity mobilizes contagion in human and animal populations
Source: bioRxiv or medRxiv preprint supplement (doi:10.1101/170266), 2020-08-12

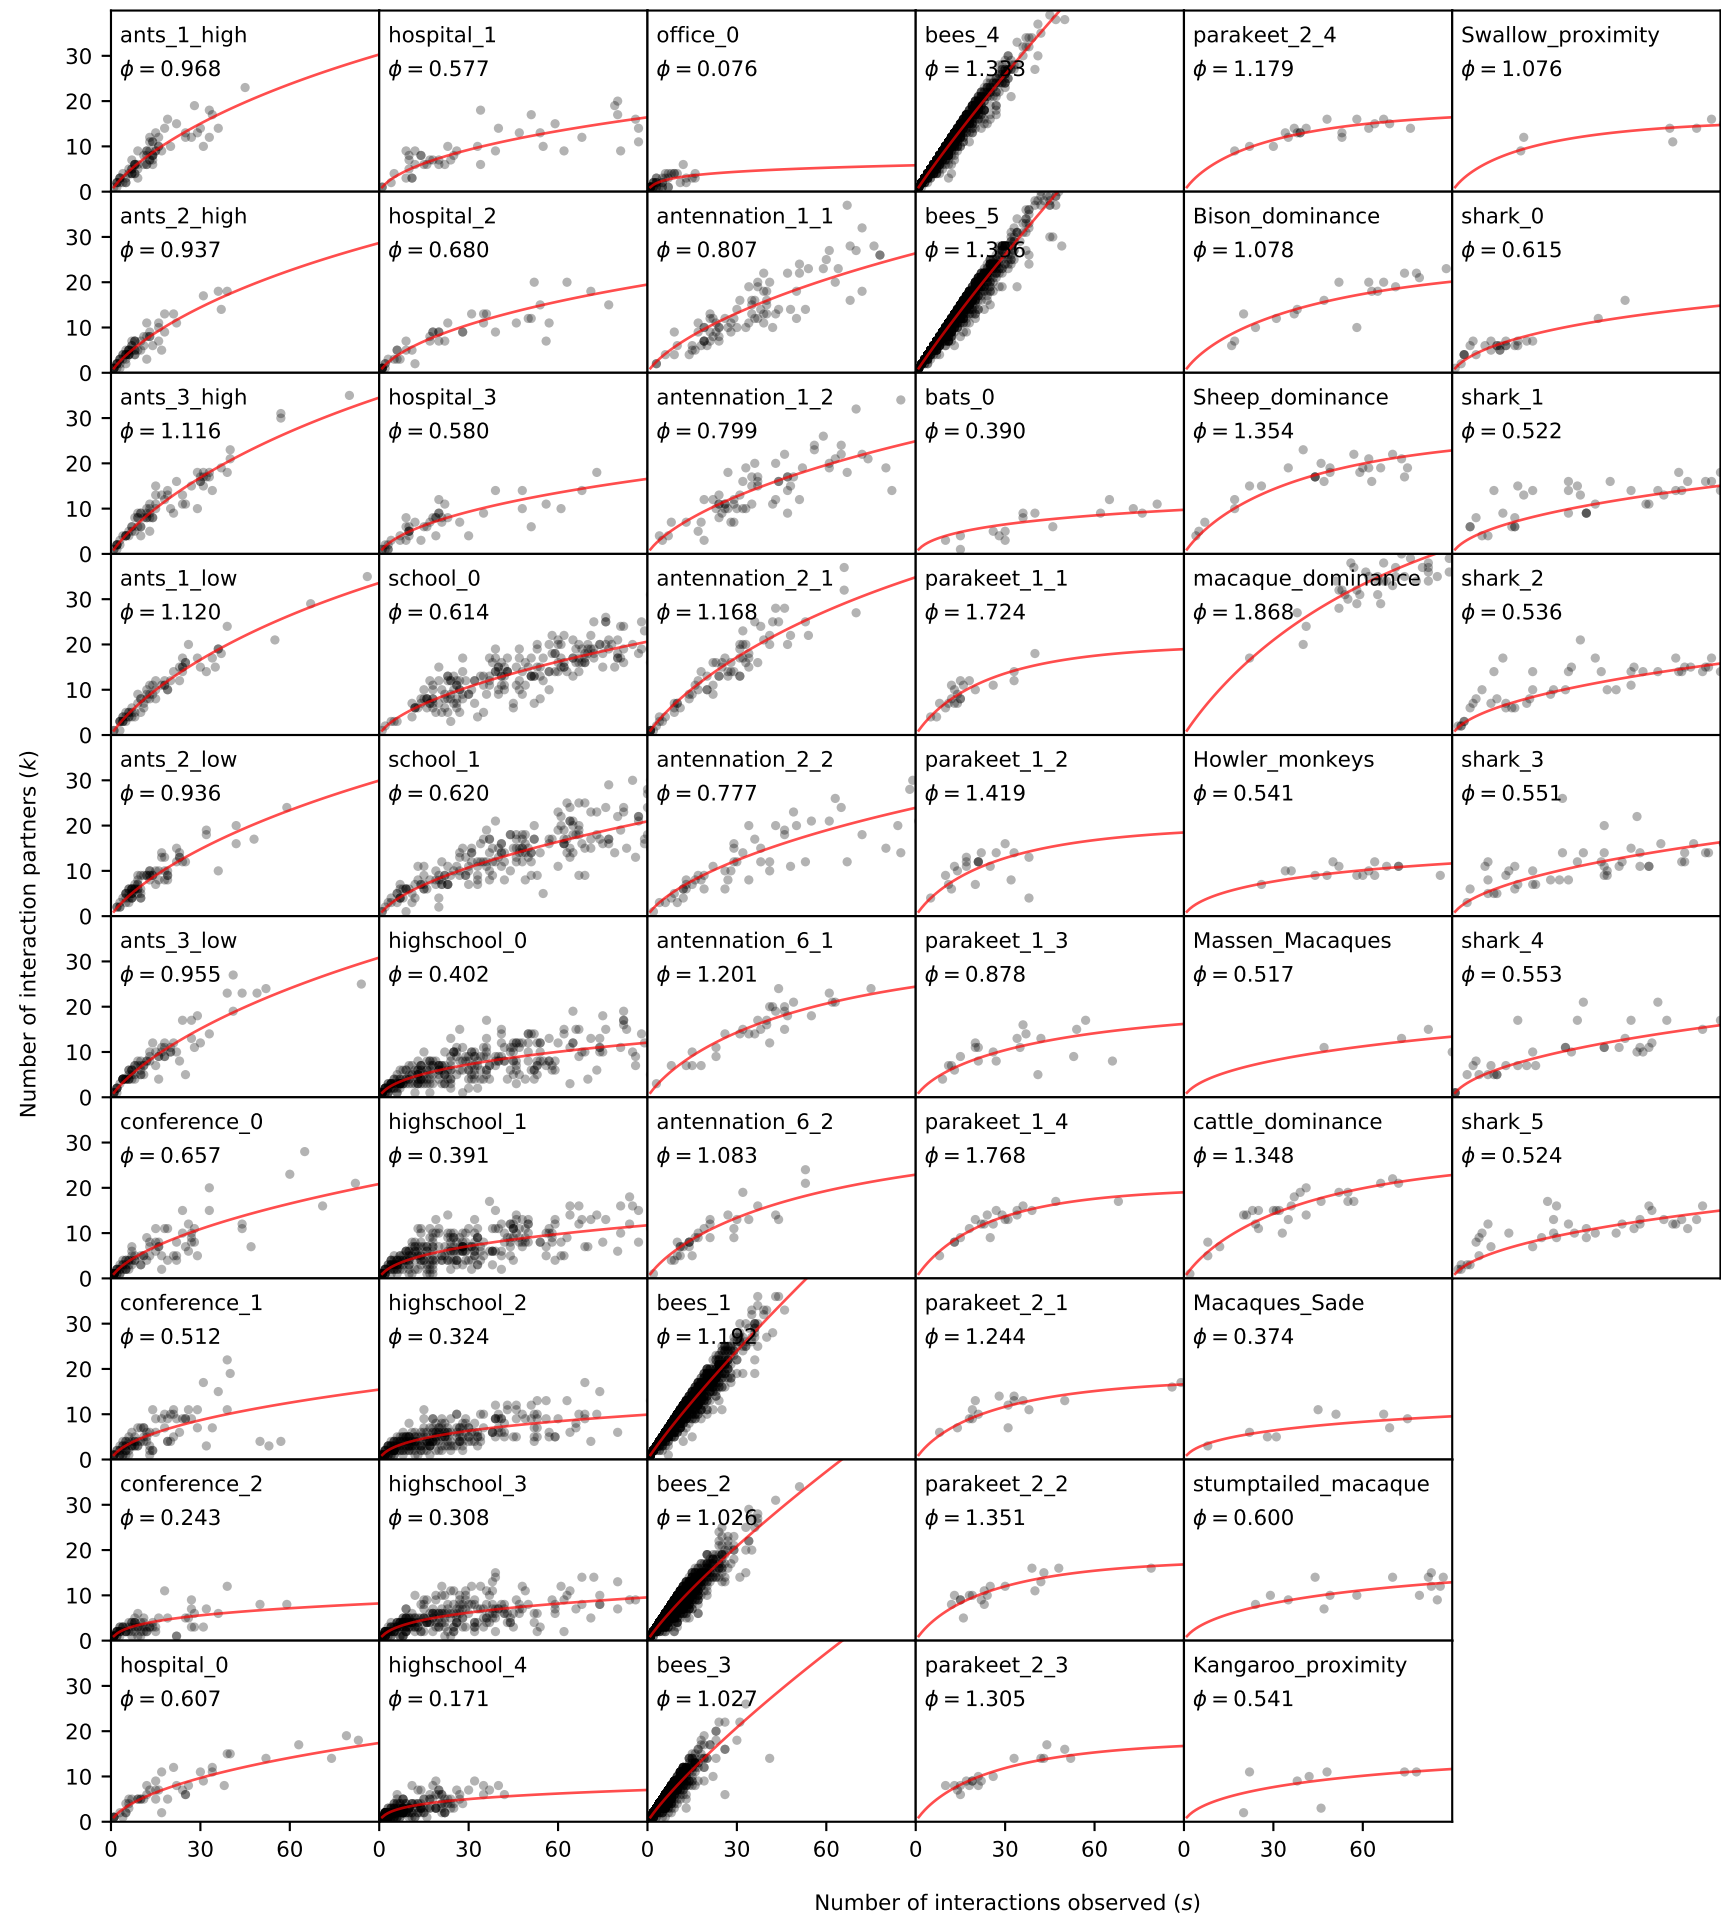

Supplement: Supplementary file [file media-3.pdf]
